# Supplementary material for: Link spacer controlled supramolecular chirality of perylene bisimide-carbohydrate conjugate
Source: Royal Society of Chemistry journal article supplement (doi:10.1039/c5ra06255a), 2015-01-01
Supplement: c5ra06255a1.pdf [file c5ra06255a1.pdf]

## Supporting Information

For

# Link Spacer Controlled Supramolecular Chirality of Perylene Bisimide-Carbohydrate Conjugates

Ke-Rang Wang,<sup>\*a, b</sup> Dan Han,<sup>a</sup> Guo-Jing Cao<sup>a</sup> and Xiao-Liu Li<sup>\*a, b</sup>

<sup>a</sup> Key Laboratory of Chemical Biology of Hebei Province, College of Chemistry and Environmental Science, Hebei University, Baoding, 071002, P. R. China. E-mail: kerangwang@hbu.edu.cn; lixl@hbu.cn.

<sup>b</sup> Key Laboratory of Medicinal Chemistry and Molecular Diagnosis, Ministry of Education, Baoding, 071002, P. R. China.

### Experimental part

#### 1. Measurements

UV-Vis spectra were recorded in a quartz cell (light path 10 mm or 5 mm) on a Shimadzu UV-3600 spectrophotometer equipped with a S-1700 temperature controller. Circular dichroism spectra were performed on MOS-450 (BioLogic). FTIR spectra were recorded in the solid phase with KBr windows on Tensor27 (Bruker optics).

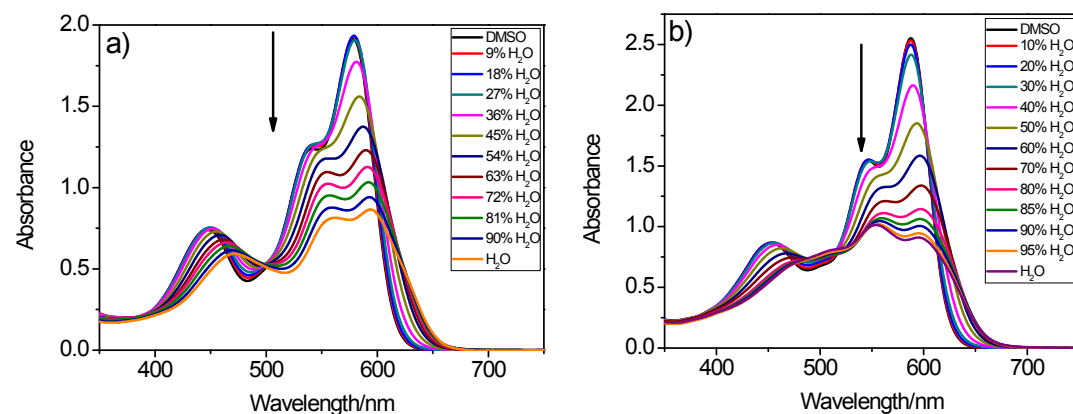

**Fig. S1** UV-Vis spectra of **PBI-6Man-2** (a,  $5 \times 10^{-5}$  M) and **PBI-6Man-1** (b,  $6 \times 10^{-5}$  M)

M) in different volume ratios of DMSO/H<sub>2</sub>O.

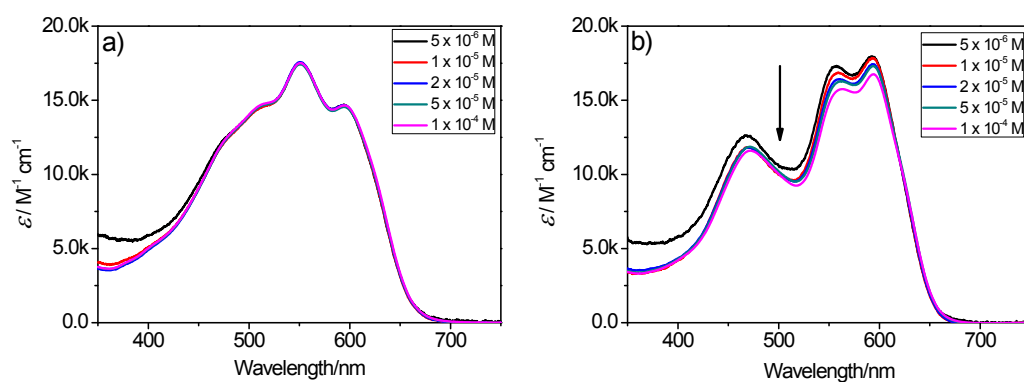

**Fig. S2** Concentration-dependent UV-Vis spectra of compounds **PBI-6Man-1** (a) and **PBI-6Man-2** (b) in water.

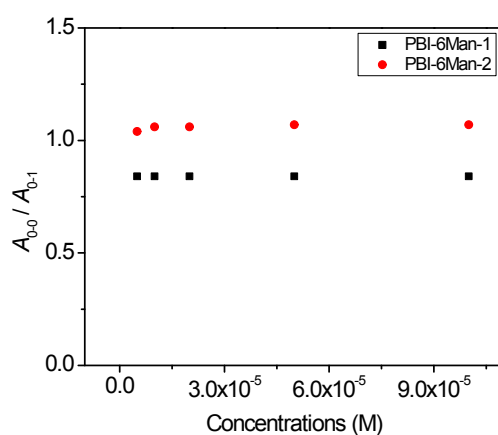

**Fig. S3** Concentration-dependent  $A_{0-0}/A_{0-1}$  ratios of compounds **PBI-6Man-1** ( $A_{595 \text{ nm}}/A_{550 \text{ nm}}$ ) and **PBI-6Man-2** ( $A_{593 \text{ nm}}/A_{557 \text{ nm}}$ ).

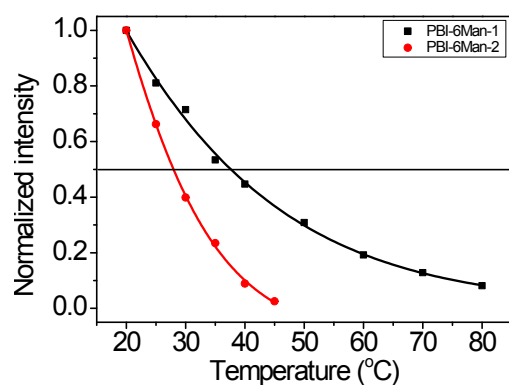

**Fig. S4** Qualitative information on aggregate stability of compounds **PBI-6Man-1** and **PBI-6Man-2** by plotting the degree of aggregation as a function of temperature at 540 nm and 550 nm.
